# Supplementary material
Source: PubMed Central journal article supplement (PMC6184452)

# Peak Monitor app

Peak Monitor options:

Select the name of the compound to display :

Select any samples you wish to exclude:

## Peak monitoring table and plot

Show  entries

Search:

|   | metNo | name               | exp_mzmed | exp_rtmed | obs_mzmed | obs_rtmed | rtd |
|---|-------|--------------------|-----------|-----------|-----------|-----------|-----|
| 3 | 1     | metabolite_EIC0603 | 411.653   | 207.74    | 411.653   | 207.74    | 0   |
| 4 | 1     | metabolite_EIC0603 | 411.653   | 207.74    | 411.6529  | 195.46    | 1:  |

Showing 1 to 2 of 2 entries

Previous  Next

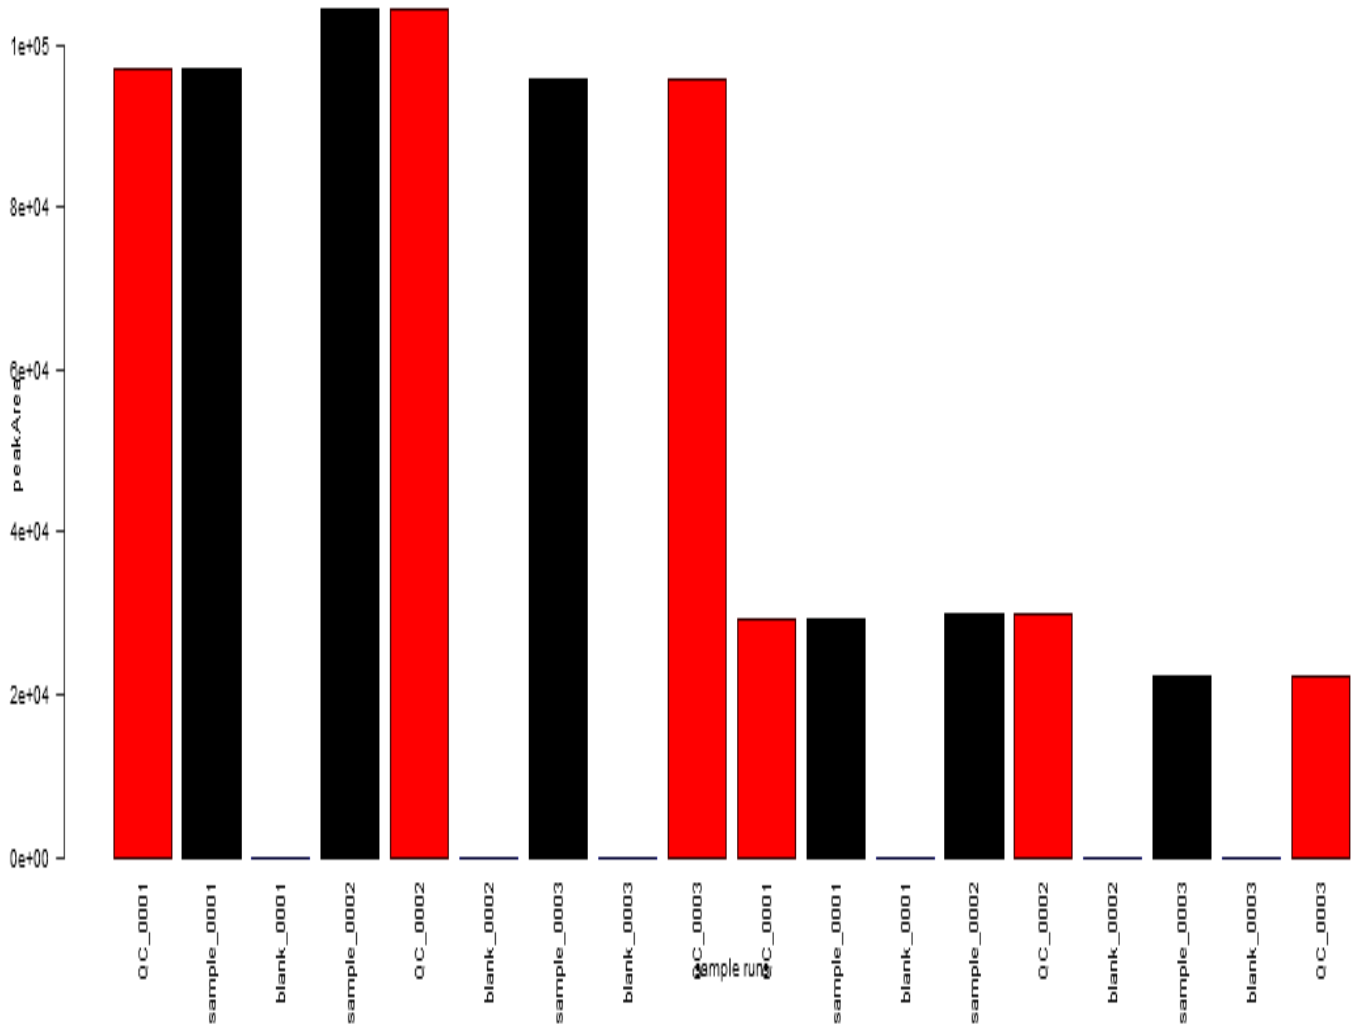

Show 10 entries

Search:

| obsNames | peakArea | sampleType | paddSampType |
|----------|----------|------------|--------------|
|----------|----------|------------|--------------|

No data available in table

Showing 0 to 0 of 0 entries

Previous Next

### PCA monitored metabolites

#### PCA plot type:

- scores
- loadings

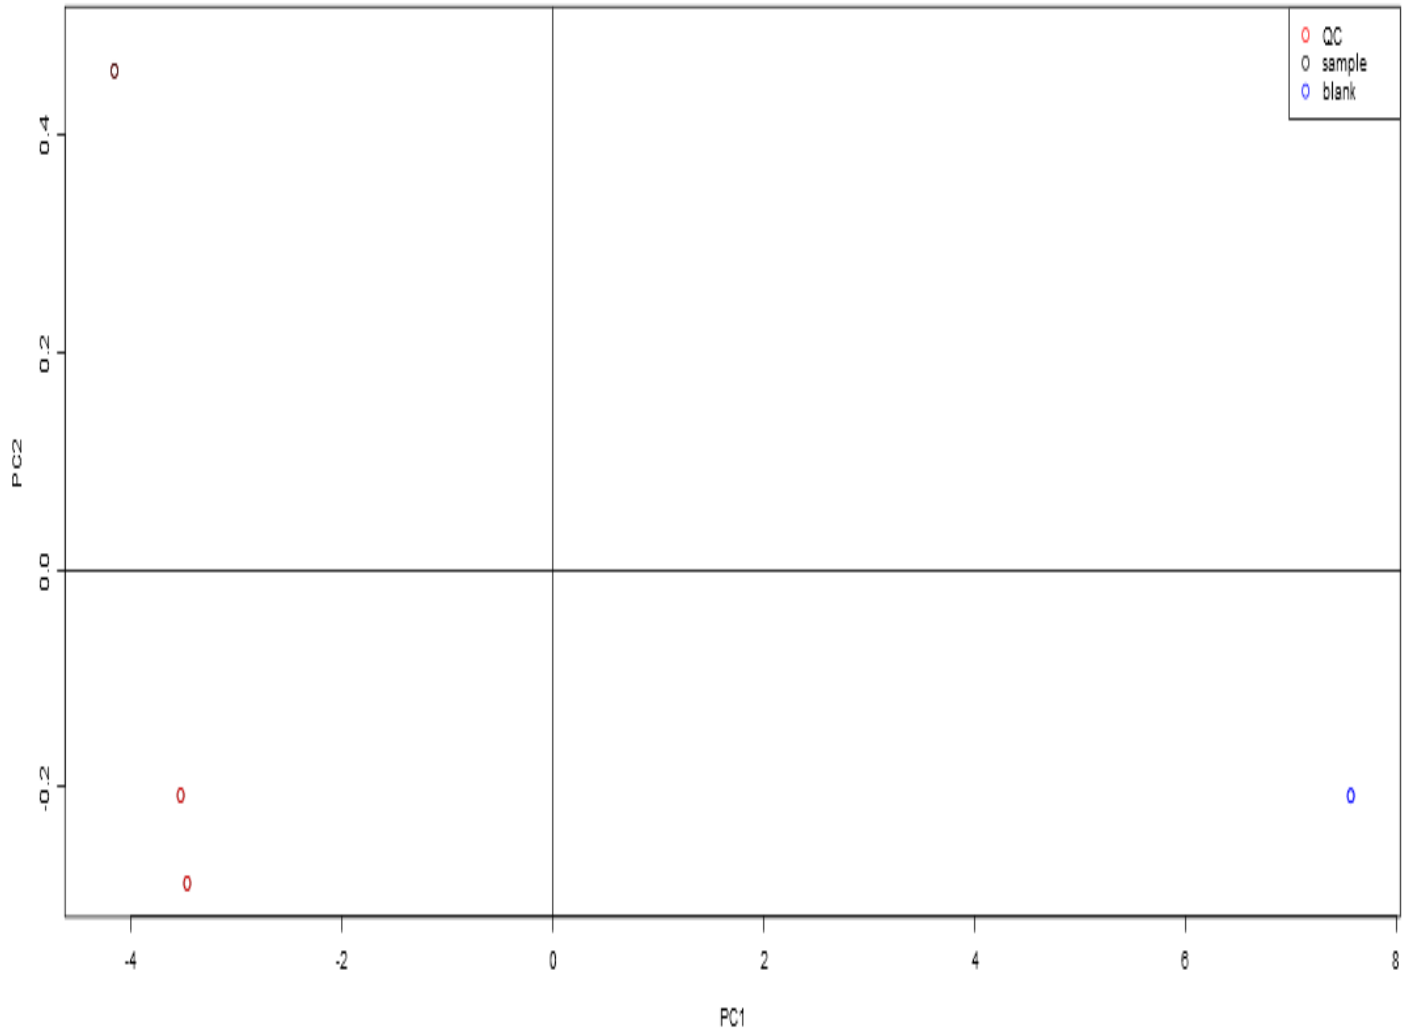

Supplement: bty218_figs1.pdf [file bty218_figs1.pdf]
