# Supplementary material
Source: PubMed Central journal article supplement (PMC6184452)

# ANOVA with replicate injection

## Volcano Plot

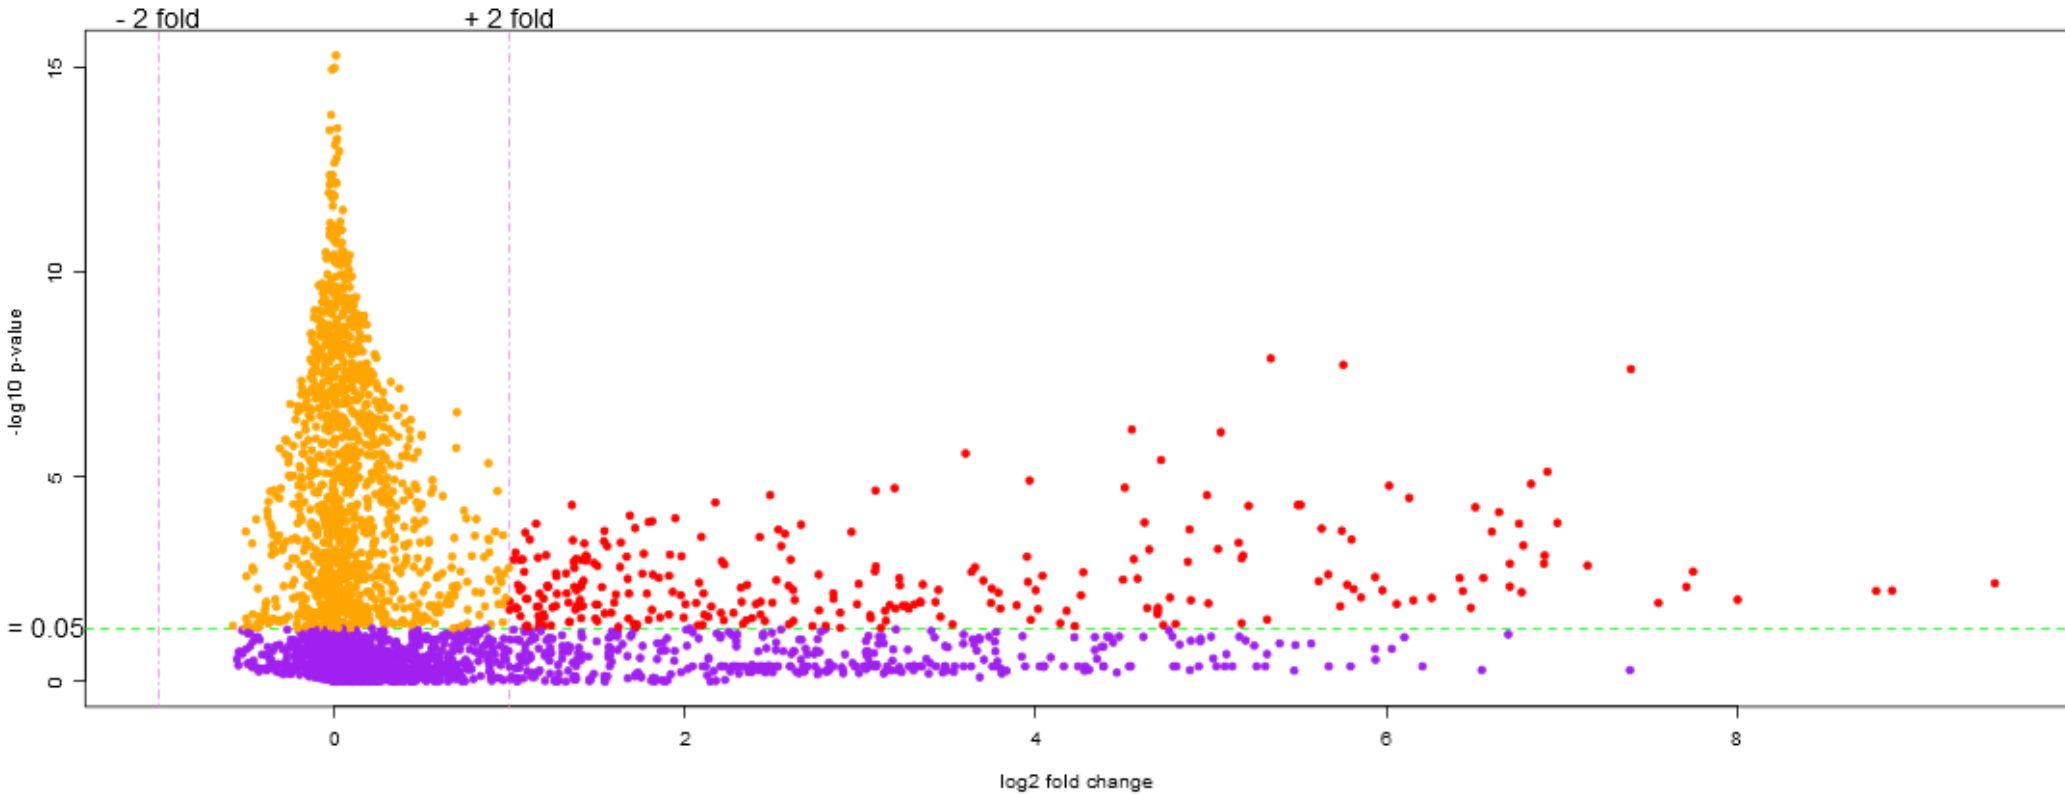

Pearson correlation with run order

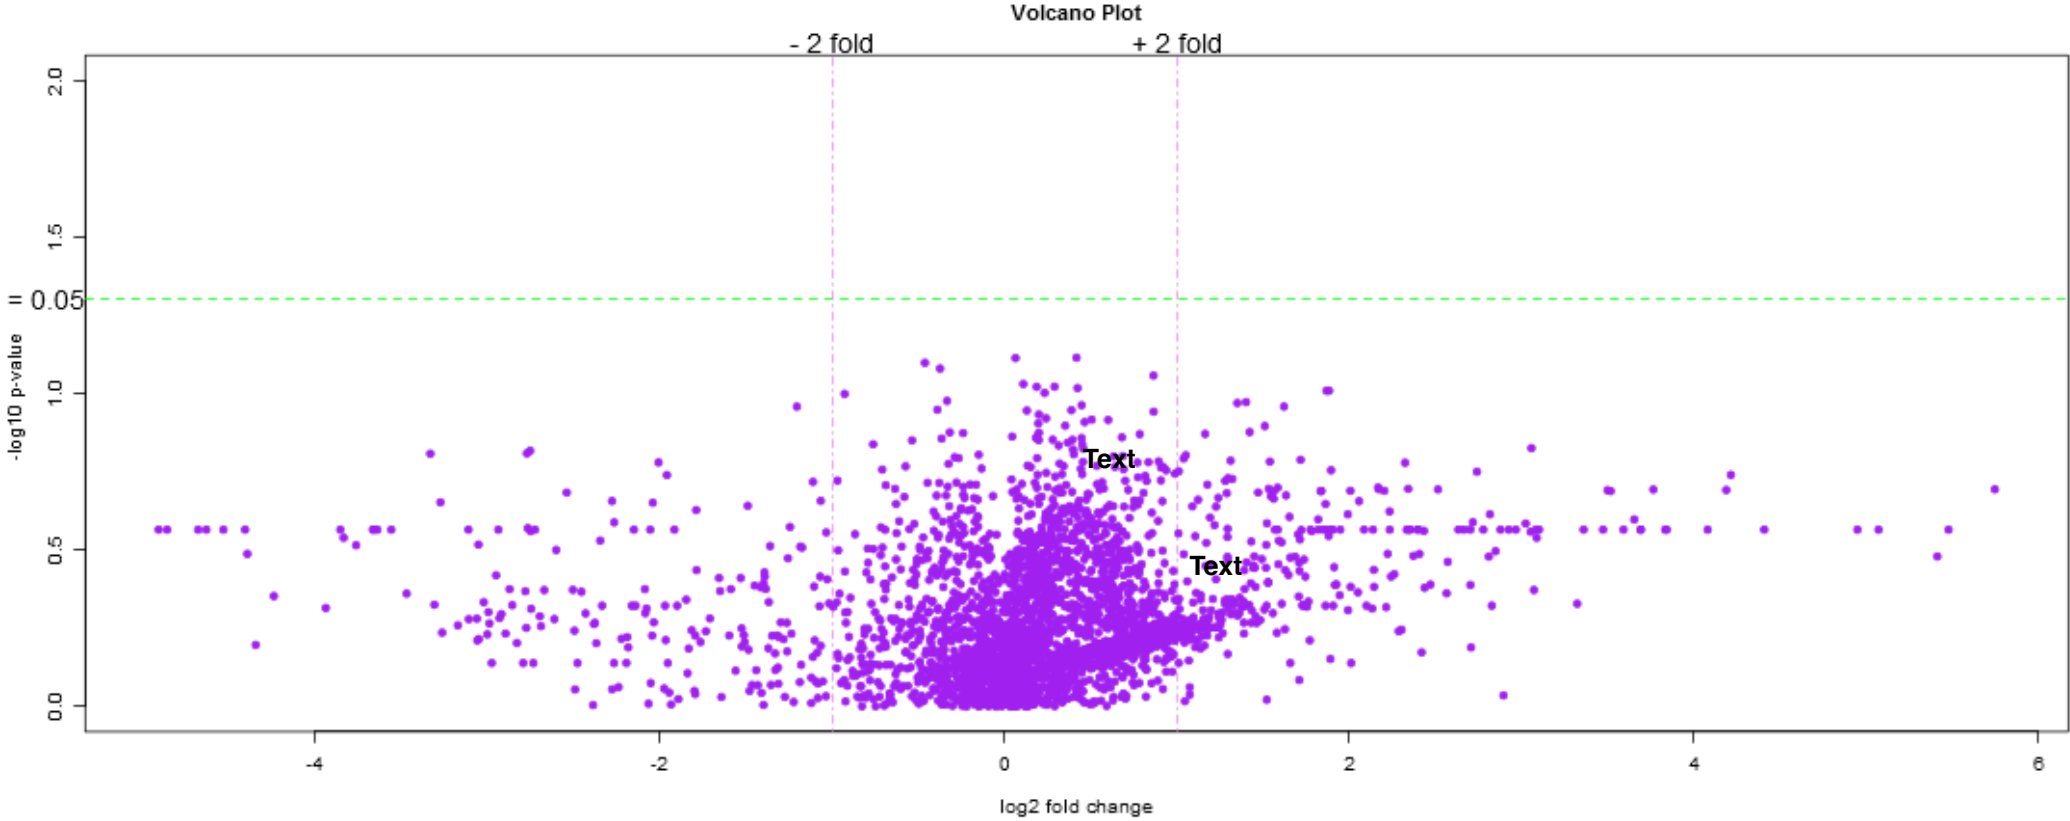

Supplement: bty218_figs2.pdf [file bty218_figs2.pdf]
